# Supplementary material
Source: publisher figshare collection journal article supplement (https://gsapubs.figshare.com/ndownloader/files/23294180)

## Data Repository (APPENDIX)

### Appendix A 1: Southern Israel

Composite section of Eocene – Early Miocene strata from Southern Israel outcrops. The lower part of this composite section is from Wadi Shlomo, the middle part is from Wadi Raham, and the upper part from the Karkom Graben. See explanations in text (for locations see Fig. 1c).

### Appendix A 2: Eastern Sinai

Composite section of Eocene – Early Miocene strata from Eastern Sinai outcrops. The lower part of this composite section is from the Darb El Haj, the middle part is from Bir Zafra and the upper part is from the Seikh Atiya (for locations see Fig. 1c). Modified after Garfunkel (1970). For locations see Fig. 1c, for legend see Appendix A 1). More explanations in text.

### Appendix A 3: Western Sinai

Composite section of Eocene – Early Miocene strata from Western Sinai outcrops. The lower part of this composite section is from Wadi Abura and the upper part is from Wadi Tayiba (for locations see Fig. 1c). Modified after Garfunkel and Bartov (1977); Garfunkel (1988) and Jackson (2008, 1970). For legend see Appendix A 1. More explanations in text.

### Appendix A 4: Southern Jordan

Composite section of Eocene – Early Miocene strata from Southern Jordan outcrops (modified after Barjous, 1988, 1995; and Ibrahim, 1993). The lower part of this composite section is from the Mahatardi region and the upper part is from Wadi Bustan (for locations see Fig. 1c; for legend see Appendix A 1. More explanations in text).

### Appendix A 5: Eastern Desert, Egypt

Composite section of Eocene – Early Miocene strata from the Eastern Desert, Egypt outcrops (modified after Klitzach et al., 1987; Said, 1990; and Abou-Khadrah et al., 1994). The lower part is from the southern Galala region and the upper part is from the north-west El Faiyum region (for locations see Figs. 1b, 1c; for legend see Appendix A 1. More explanations in text).



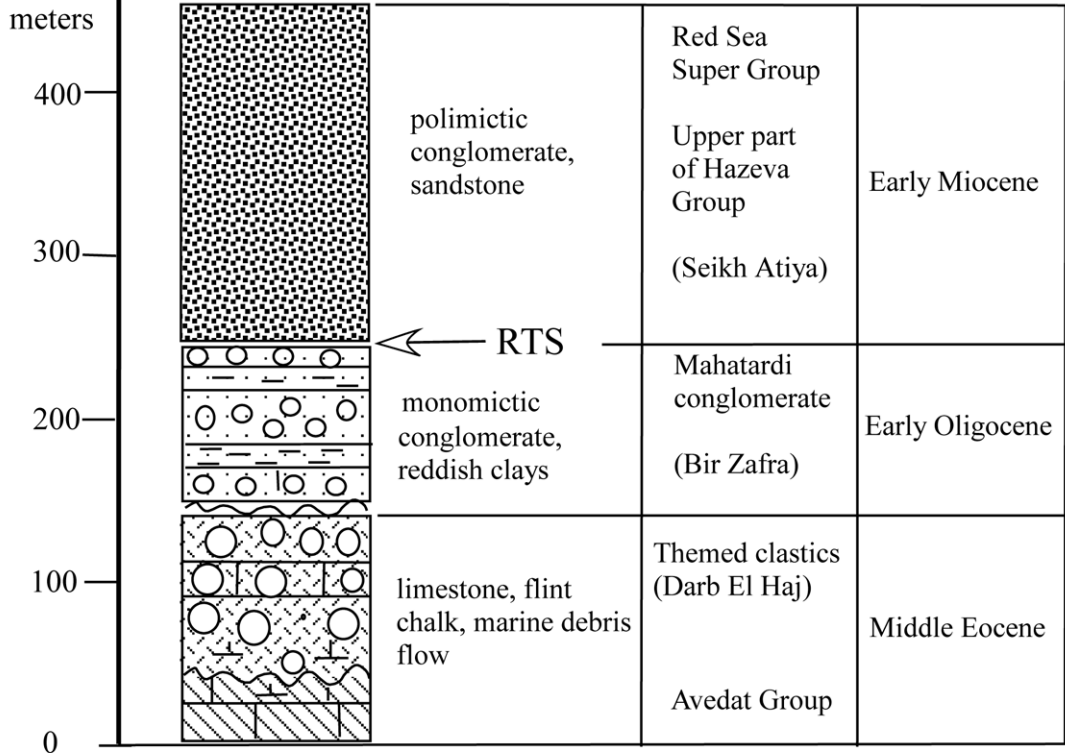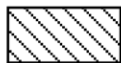

**Marine sediments**

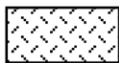

**Themed clastics**

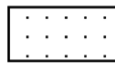

**Mahatardi conglomerate**

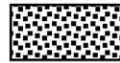

**Red Sea Supper Group (lower part)**

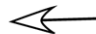

**RTS unconformity**

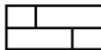

**limestone**

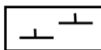

**chalk**

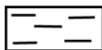

**marl**

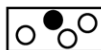

**conglomerate**

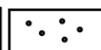

**sandstone**

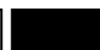

**basalt flow**

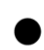

**flint**

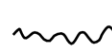

**unconformity**

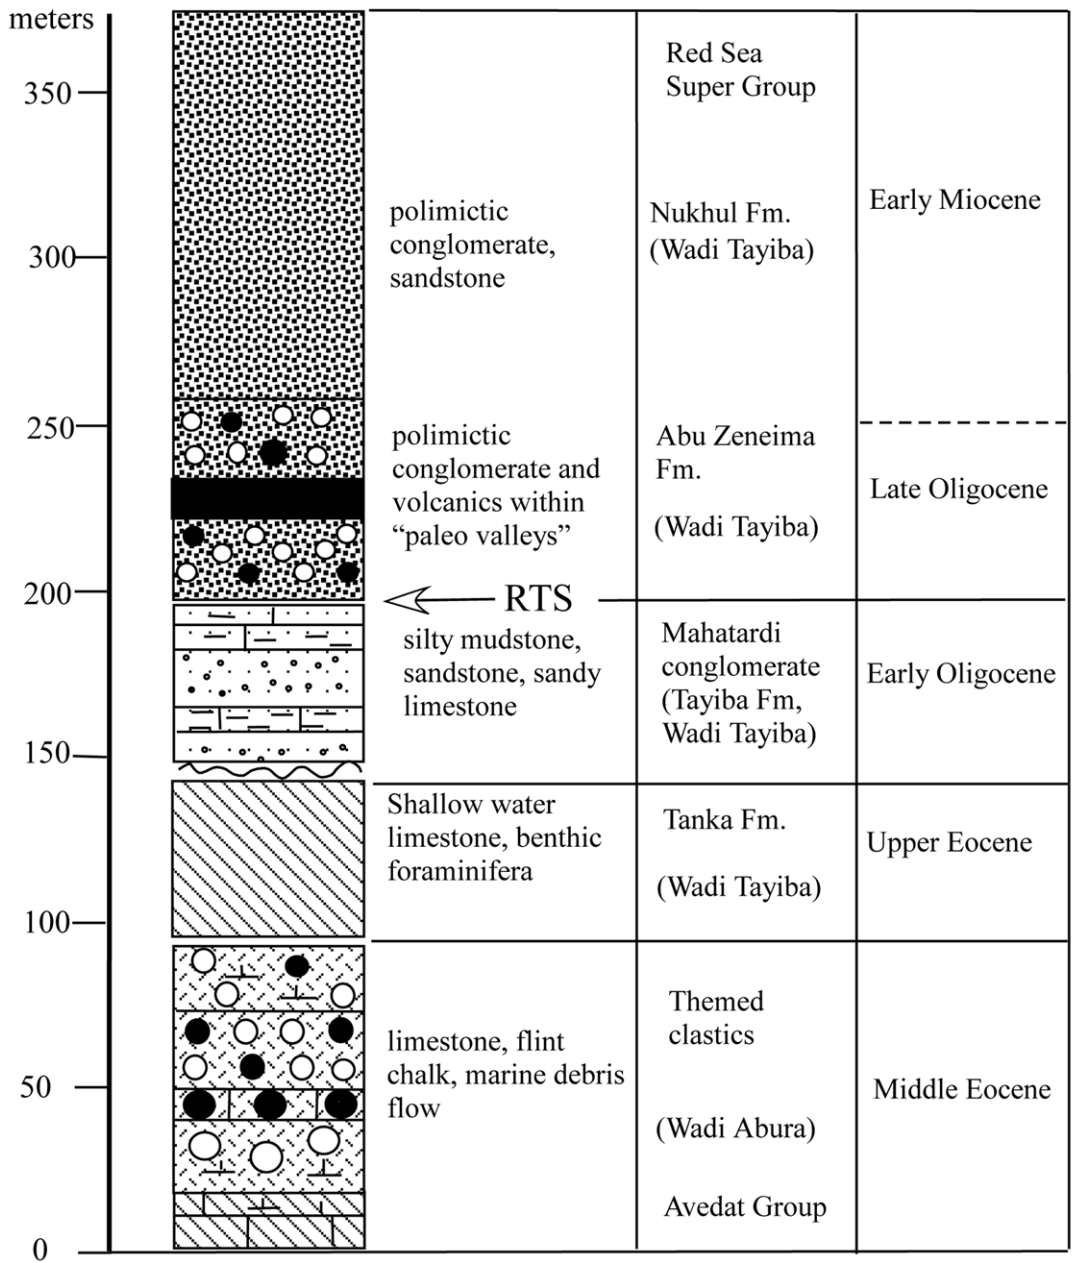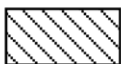

Marine sediments

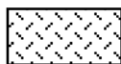

Themed clastics

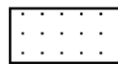

Mahatardi conglomerate

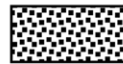

Red Sea Supper Group (lower part)

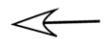

RTS unconformity

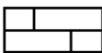

limestone

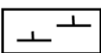

chalk

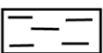

marl

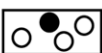

conglomerate

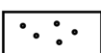

sandstone

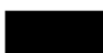

basalt flow

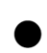

flint

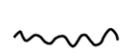

unconformity

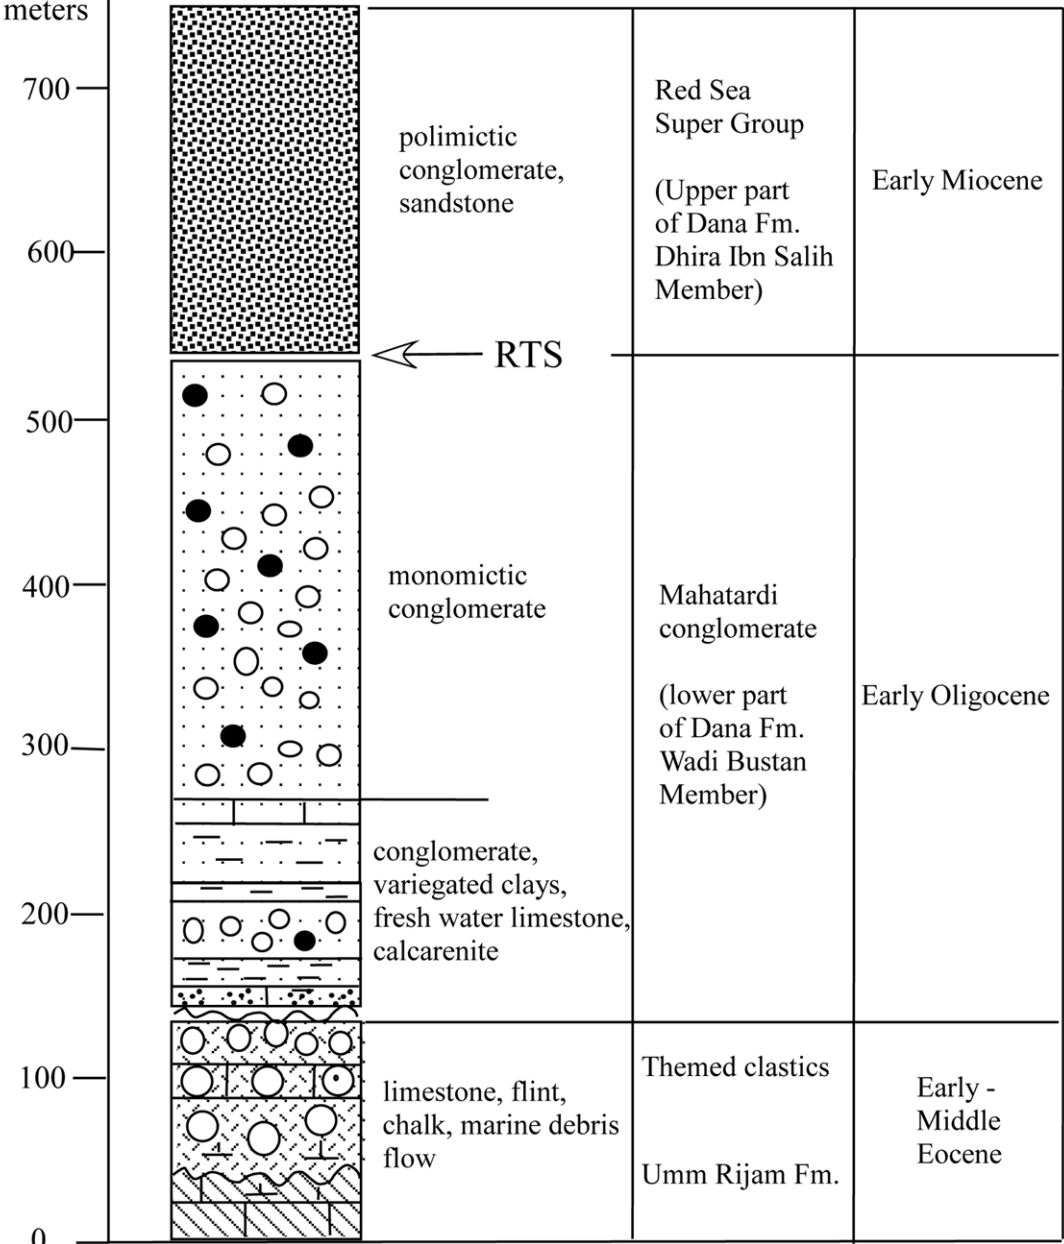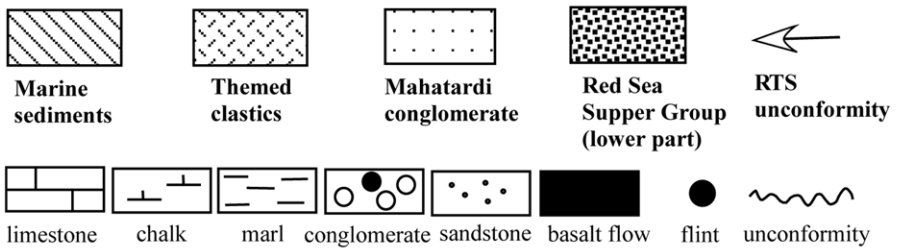

Supplement: Supplementary file 1 [file 23294180]
